# Supplementary material
Source: HighWire-hosted journal article supplement (https://bmjopen.bmj.com/content/9/10/e028637)

## Appendix 1

## HCUs with no hospitalization costs during incident year: contribution of cost categories

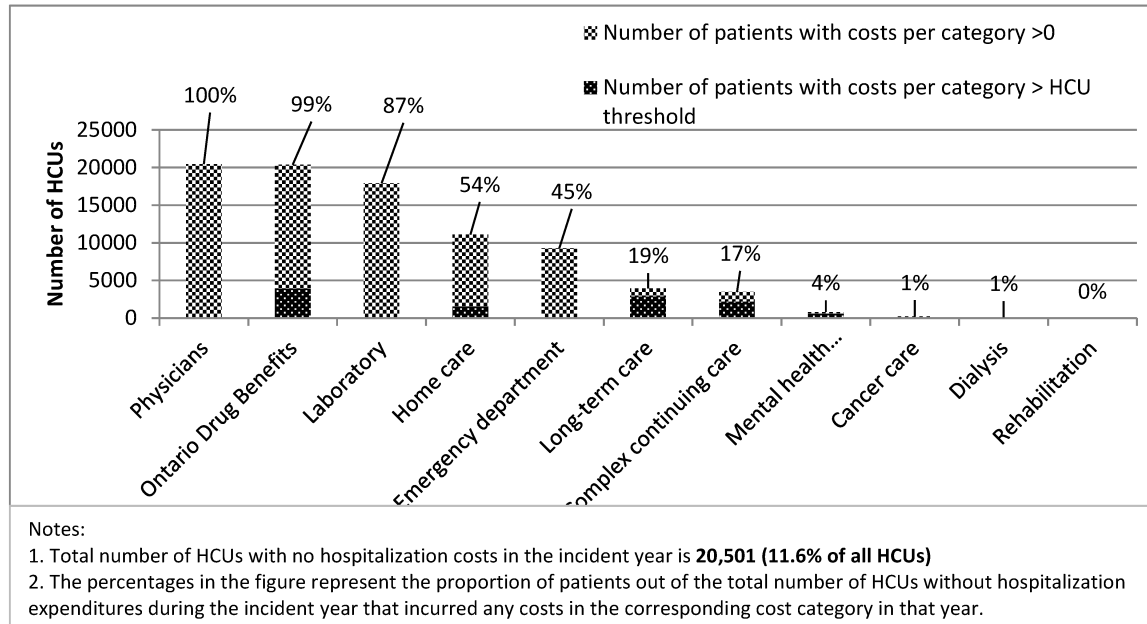

Supplement: inline-supplementary-material-2 [file inline-supplementary-material-2.pdf]
